# Supplementary material for: β-Peltoboykinolic Acid from Astilbe rubra Attenuates TGF-β1-Induced Epithelial-to-Mesenchymal Transitions in Lung Alveolar Epithelial Cells
Source: Molecules. 2019 Jul 15;24(14):2573. doi: 10.3390/molecules24142573 (PMC6680586; doi:10.3390/molecules24142573)
Supplement: Supplementary file 1 [file molecules-24-02573-s001.pdf]

## **$\beta$ -peltoboykinolic acid from *Astilbe rubra* attenuates TGF- $\beta$ 1-induced epithelial-to-mesenchymal transitions in lung alveolar epithelial cells**

**In Jae Bang <sup>1,†</sup>, Ha Ryong Kim <sup>2,†</sup>, Yukyoung Jeon <sup>1</sup>, Mi Ho Jeong <sup>1</sup>, Yong Joo Park <sup>1</sup>, Jong Hwan Kwak <sup>1</sup>, Kyu Hyuck Chung <sup>1,\*</sup>**

<sup>1</sup> School of Pharmacy, Sungkyunkwan University, Suwon 16419, Republic of Korea; injae753@naver.com (I.J. Bang); jeon1112@skku.edu (Y. Jeon); algh8906@naver.com (M.H. Jeong); pyj084@msn.com (Y.J. Park); jhkwak@skku.edu (J.H. Kwak)

<sup>2</sup> College of Pharmacy, Daegu Catholic University, Gyeongsan 38430, Republic of Korea; kimhr@cu.ac.kr (H.R. Kim)

\* Correspondence: khchung@skku.edu (K.H. Chung)

Received: date; Accepted: date; Published: date

† These authors contributed equally to this work

#### *Cell viability assay*

The WST-1 assay was conducted to find an appropriate treatment concentration of test samples in A549 cells. The cells were seeded in 96-well plates at a density of  $15 \times 10^3$  cells/well. After culture for 24 h, the cells were treated with samples for 48 h. Ten microliters of WST-1 reagent (Roche Diagnostics, Montclair, NJ, USA) were added to each well, in accordance with the manufacturer's instructions, and the plates were incubated in 5% CO<sub>2</sub> at 37 °C for 30 min. Cell viability was quantified through the measurement of the absorbance at 440 nm and 690 nm by using a VERSAmax microplate reader (Molecular Devices, Sunnyvale, CA, USA).

#### *Identification of $\beta$ -peltoboykinolic acid*

$\beta$ -peltoboykinolic acid was identified by spectroscopic analysis including <sup>1</sup>H-NMR (850 MHz; Bruker AVNACE III HD 850 MHz NMR spectrometer, Ettlingen Germany) and <sup>13</sup>C-NMR (100 MHz; Bruker Ascend 400 MHz NMR spectrometer, Ettlingen, Germany).

### **Results**

**Figure S1.** A549 cells were incubated with 70% ethanol extract of *A. rubra* whole plant (ARE; 2, 8, 31, 125, and 500  $\mu$ g/mL) for 48 h, and the WST-1 assay was conducted. ARE decreased the viability of A549 cells in a dose-dependent manner; a cell viability of over 80% was observed after treatment at 125  $\mu$ g/mL (Figure S1A). A549 cells were incubated with the fractional extracts derived from *A. rubra* extract (8, 31, 125, 250 and 500  $\mu$ g/mL) for 48 h and cell viability was measured by using the WST-1 assay. In both the rhizome and aerial parts, all solvent fractions at a concentration of 100  $\mu$ g/mL, except CH<sub>2</sub>Cl<sub>2</sub> fractions from the extracts of aerial part and rhizome of *A. rubra* (ARADF and ARRDF, respectively), resulted in a cell viability of over 80%. For ARADF and ARRDF, a cell viability of over 80% was obtained at a treatment concentration of 50  $\mu$ g/mL (Figure S1B).

**Figure S4.** The treatment concentration of  $\beta$ -peltoboykinolic acid was determined by WST-1 assay. A549 cells were incubated with  $\beta$ -peltoboykinolic acid for 48 h. Because a significant cytotoxicity was observed at more 20  $\mu$ g/mL of  $\beta$ -peltoboykinolic acid, 10  $\mu$ g/mL concentration was determined as maximum treatment concentration.

**Table 1.** Primers used in qRT-PCR

| Primer      | Sequence                                                                        |
|-------------|---------------------------------------------------------------------------------|
| N-cadherin  | Forward: 5'-ACAGTGGCCACCTACAAAGG-3'<br>Reverse: 5'-CCGAGATGGGGTTGATAATG-3'      |
| Vimentin    | Forward: 5'-GAGAACTTTGCCGTTGAAGC-3'<br>Reverse: 5'-GCTTCCTGTAGGTGGCAATC-3'      |
| E-cadheirn  | Forward: 5'-TGCCCAGAAAATGAAAAAGG-3'<br>Reverse: 5'-GTGTATGTGGCAATGCGTTC-3'      |
| CoL1A1      | Forward: 5'-GGCAACAGCCGCTTCACCTAC-3'<br>Reverse: 5'-GCGGGAGGACTTGGTGGTTTT-3'    |
| Snail       | Forward: 5'-GAGAACTTTGCCGTTGAAGC-3'<br>Reverse: 5'-GCTTCCTGTAGGTGGCAATC-3'      |
| Fibronectin | Forward: 5'-CAGTGGGAGACCTCGAGAAG-3'<br>Reverse: 5'-TCCCTCGGAACATCAGAAAC-3'      |
| GAPDH       | Forward: 5'-AGATCATCAGCAATGCAATGCCTCC-3'<br>Reverse: 5'-ATGGCATGGACTGTGGTCAT-3' |

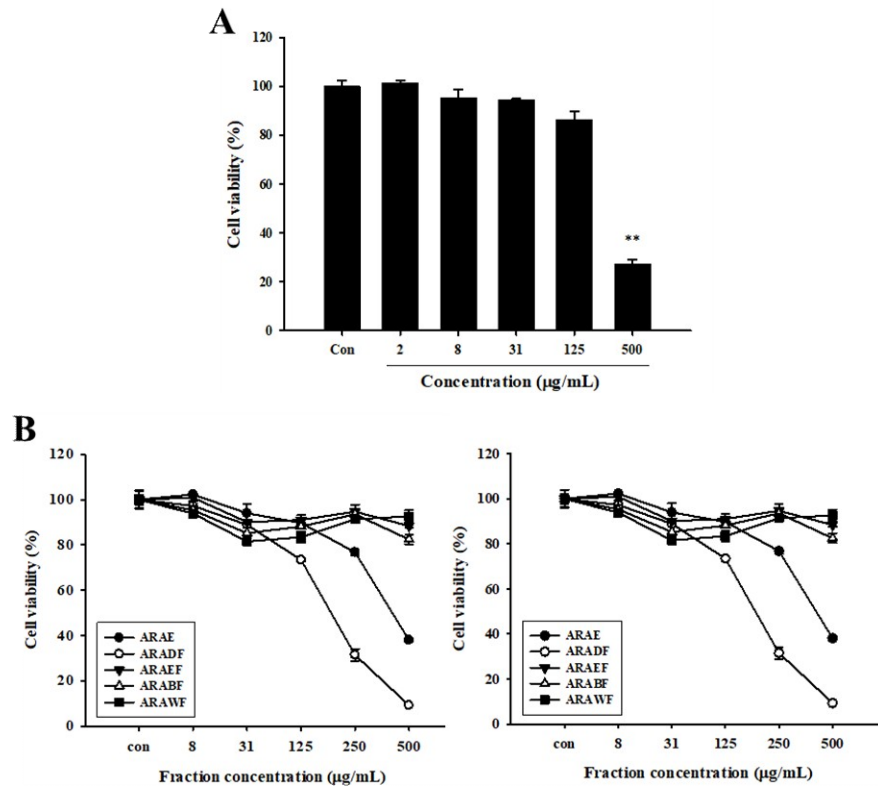

**Figure S1.** A549 cells were treated with different concentrations of (A) extracts, (B) solvent fractions of *Astilbe rubra* (left, fractions from the aerial part of *A. rubra*; right, fractions from the rhizome of *A. rubra*). Cell viability was evaluated by using the WST-1 assay

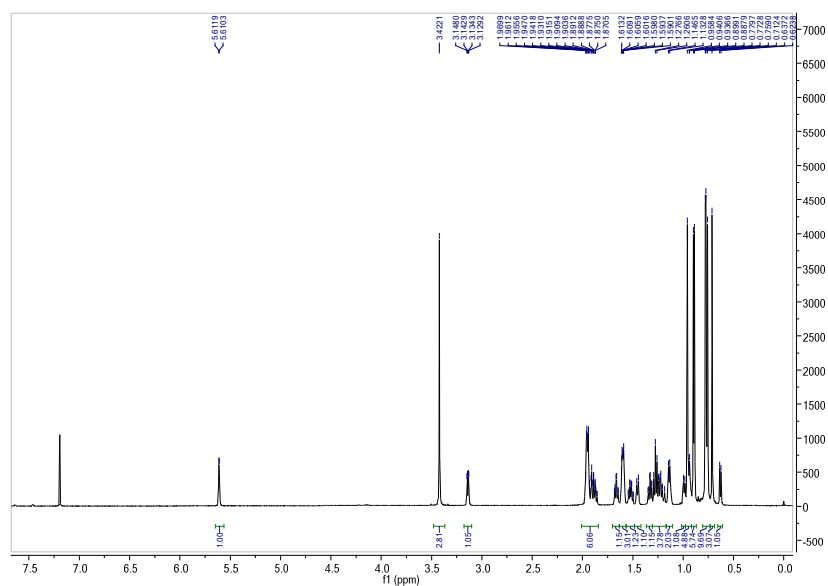

**Figure S2A.**  $^1\text{H}$ -NMR spectrum of  $\beta$ -peltoboykinolic acid isolated from *Astilbe rubra* ( $\text{CDCl}_3$ , 850 MHz).

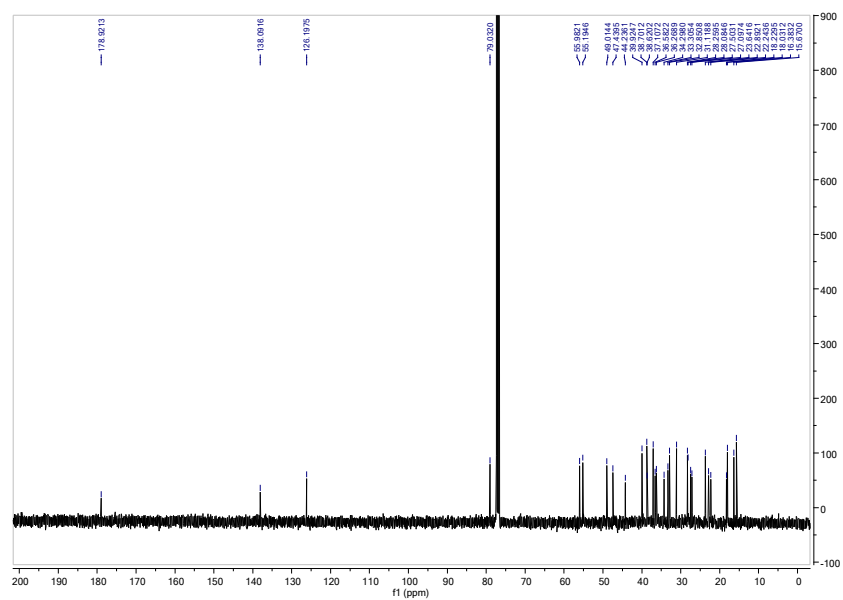

**Figure S2B.**  $^{13}\text{C}$ -NMR spectrum of  $\beta$ -peltoboykinolic acid isolated from *Astilbe rubra* ( $\text{CDCl}_3$ , 100 MHz).

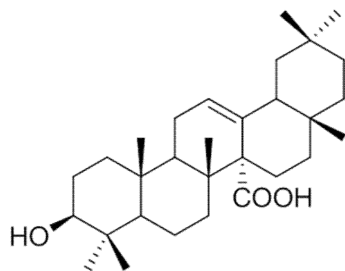

**$\beta$ -peltoboykinolic acid**

Figure S3. Structure of  $\beta$ -peltoboykinolic acid

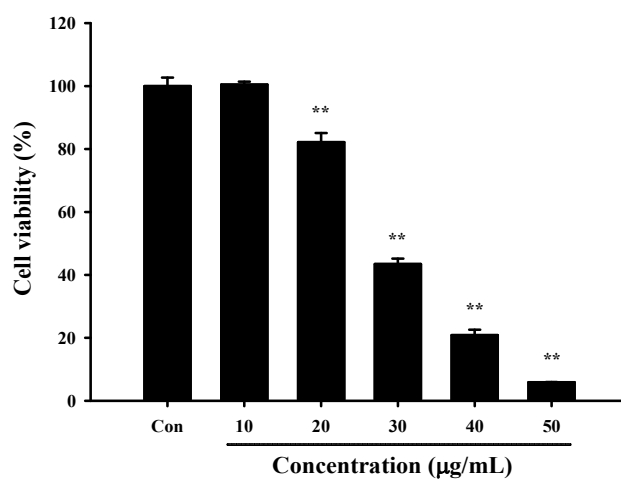

Figure S4. A549 cells were treated with different concentrations of  $\beta$ -peltoboykinolic for 48 h. Cell viability was evaluated by using the WST-1 assay.
